# Supplementary material for: Effect of sulfur dioxide impurities on the electrochemical reduction of carbon dioxide over Cu-based bimetal catalysts
Source: Royal Society of Chemistry journal article supplement (doi:10.1039/d4nj02713b), 2024-01-01
Supplement: d4nj02713b1.pdf [file d4nj02713b1.pdf]

Electronic Supplementary Material for:

## **Effect of sulfur dioxide impurity on electrochemical reduction of carbon dioxide over Cu-based bimetal catalysts**

Zhen Wang<sup>1,3#</sup>, Bo Xiong<sup>1#</sup>, Yingju Yang<sup>1,2\*</sup>, Jing Liu<sup>1,2</sup>, Man Chen<sup>1</sup>

<sup>1</sup> State Key Laboratory of Coal Combustion, School of Energy and Power Engineering, Huazhong University of Science and Technology, Wuhan 430074, China

<sup>2</sup> Shenzhen Institute of Huazhong University of Science and Technology, Shenzhen 518057, China

<sup>3</sup> State Key Joint Laboratory of Environment Simulation and Pollution Control, School of Environment, Tsinghua University, Beijing 100084, China

### **Corresponding Author:**

\* Tel: +86 27 87545526; fax: +86 27 87545526;

E-mail address: [yangyingju@hust.edu.cn](mailto:yangyingju@hust.edu.cn).

**Content includes:** one.

**Table S1** DFT calculated free energy of potential limiting step in eV.

**Fig. S1** Schematic illustration of the structural model of the Cu-M (M = Cr, Fe, Mn, Ru, Os, Ir, Mo,

W, Ni and Pd) surface.

**Fig. S2** Optimized structures of S elemental substance adsorption on the catalyst surface at the Hollow site.

**Fig. S3** Optimized structures of COOH\* over the Cu-M (M = Cr, Fe, Mn, Ru, Os, Ir, Mo, W, Ni and Pd) catalysts.

**Fig. S4** Optimized structures of CO\* over the Cu-M (M = Cr, Fe, Mn, Ru, Os, Ir, Mo, W, Ni and Pd) catalysts.

## Free Energy Calculation

The free energies of the reaction intermediates were derived from the corresponding binding energies by adding the zero-point energy (ZPE), and entropy ( $-TS$ ) corrections, which were calculated based on the vibrational frequency analysis. The computational hydrogen electrode (CHE) model was used to estimate the free energy change ( $\Delta G$ ) at each elementary step:

$$\Delta G = \Delta E + \Delta E_{\text{ZPE}} - T\Delta S \quad (\text{S1})$$

where  $E$ ,  $E_{\text{ZPE}}$ ,  $S$ , and  $T$  represent the DFT-optimized energy, zero-point energy, entropy, and temperature (298 K), respectively.

The adsorption energy ( $E_{\text{ad}}$ ) is used to evaluate the interaction strength between the small molecule species and catalyst surface, and is expressed by the following formula:

$$E_{\text{ad}} = E_{(\text{catalyst-M})} - (E_{\text{catalyst}} + E_{\text{M}}) \quad (\text{S2})$$

where  $E_{(\text{catalyst-M})}$ ,  $E_{\text{catalyst}}$ , and  $E_{\text{M}}$  represent the total energies of the catalyst surface covered by adsorbate, the clean catalyst surface, and the unabsorbed molecules, respectively.

CO<sub>2</sub>RR-to-CO is a two-electron-transfer process including three steps:

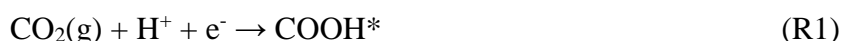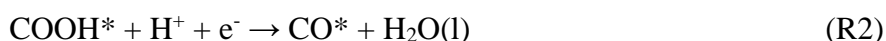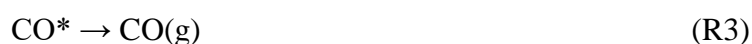

CO<sub>2</sub>RR-to-HCOOH is also a two-electron-transfer process including two steps:

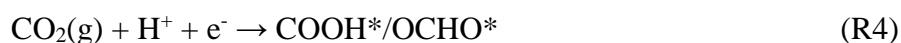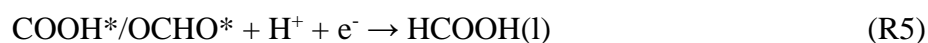

where \* denotes active site of electrocatalysts. (l) and (g) represent liquid and gaseous phases, respectively. COOH\*, CO\*, and OCHO\* are the adsorbed-state intermediates of the CO<sub>2</sub>RR.

**Table S1** DFT calculated free energy of potential limiting step in eV.

| Catalyst | Clean surface | S-doped surface |
|----------|---------------|-----------------|
| Cu-Cr    | 0.426         | 0.605           |
| Cu-Fe    | 0.738         | 0.866           |
| Cu-Mn    | 0.491         | 0.669           |
| Cu-Ru    | 1.239         | 1.301           |
| Cu-Os    | 1.458         | 1.616           |
| Cu-Ir    | 1.091         | 1.130           |
| Cu-Mo    | 1.035         | 1.067           |
| Cu-W     | 1.251         | 0.528           |
| Cu-Ni    | 0.803         | 1.165           |
| Cu-Pd    | 0.780         | 0.446           |

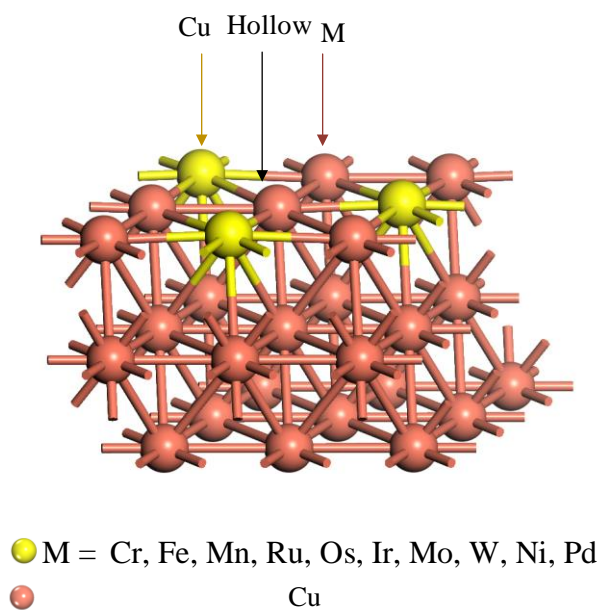

**Fig. S1** Schematic illustration of the structural model of the Cu-M (M = Cr, Fe, Mn, Ru, Os, Ir, Mo, W, Ni and Pd) surface.

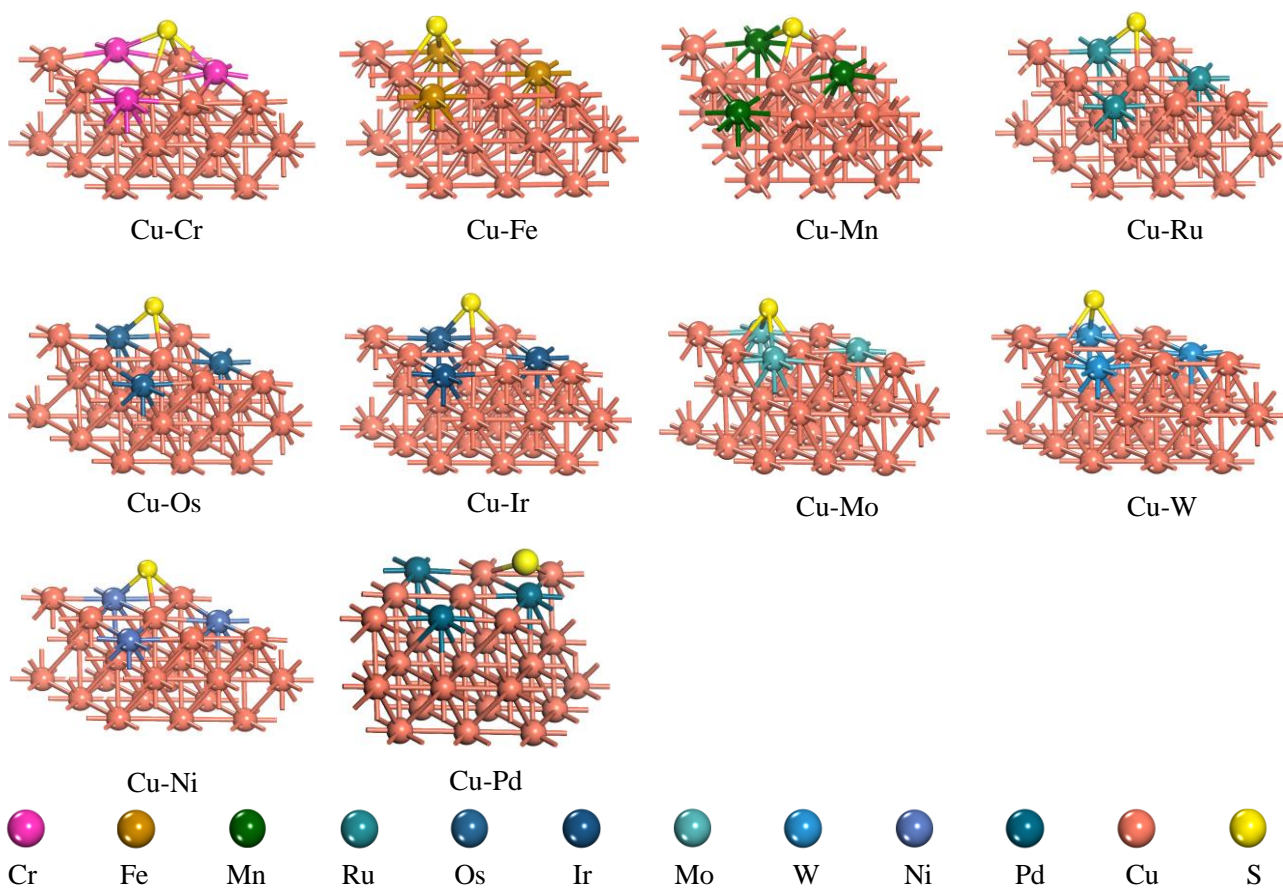

**Fig. S2** Optimized structures of S elemental substance adsorption on the catalyst surface at the Hollow site.

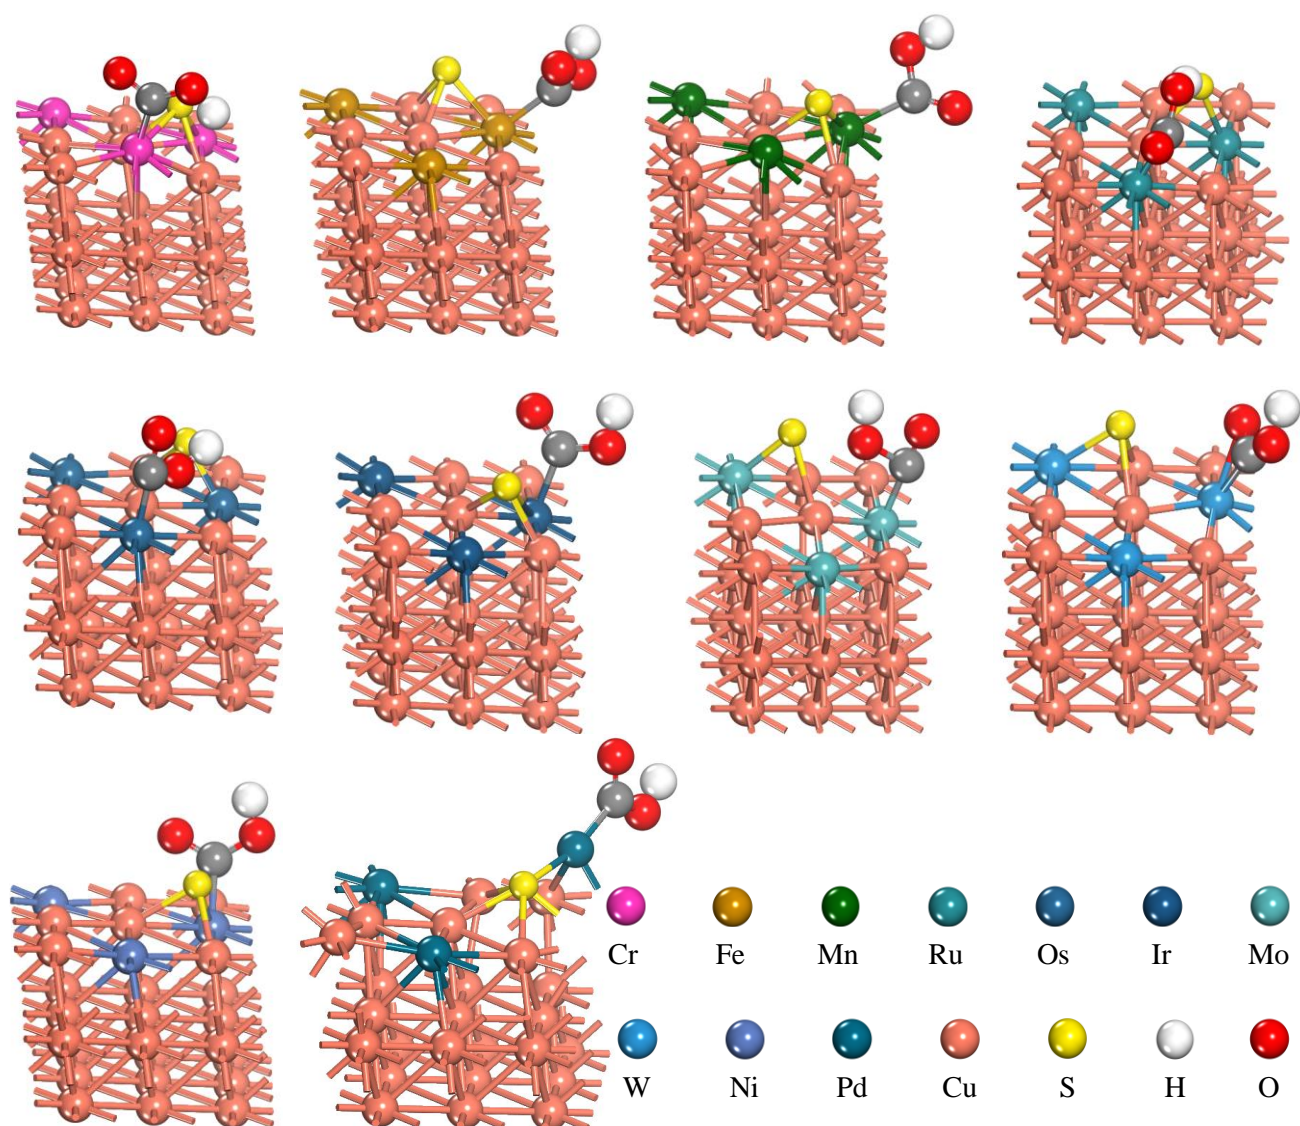

**Fig. S3** Optimized structures of COOH\* over the Cu-M (M = Cr, Fe, Mn, Ru, Os, Ir, Mo, W, Ni and Pd) catalysts.



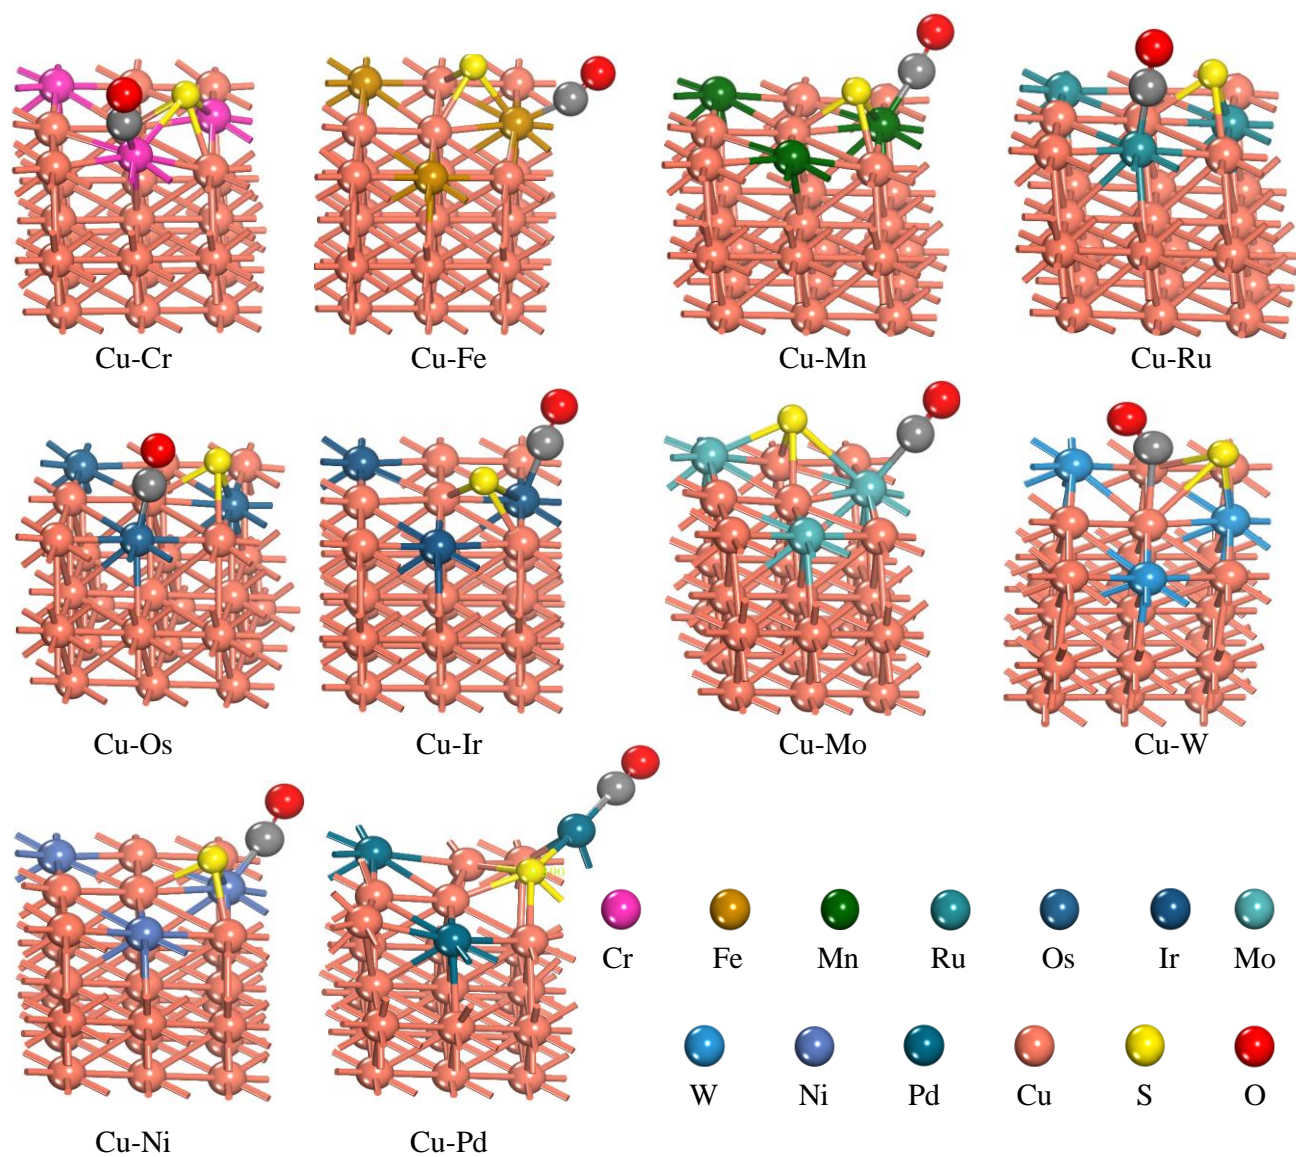

**Fig. S4** Optimized structures of CO\* over the Cu-M (M = Cr, Fe, Mn, Ru, Os, Ir, Mo, W, Ni and Pd) catalysts.
